# Supplementary material
Source: PubMed Central journal article supplement (PMC3346099)
Supplement: supp_M111.322669_jbc.M111.322669-1.pdf [file supp_M111.322669_jbc.M111.322669-1.pdf]

**Supplemental Figure:**

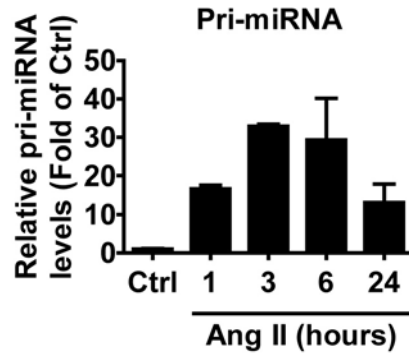

**Fig. S1: Upregulation of intergenic precursor of miR-132 and miR-212 (pri-miRNA).** Levels of miR-132/212 pri-miRNA were analyzed by Taqman pri-miRNA assay in control (Ctrl) or Ang II-treated (100 nM) RVSMC at indicated time points. Data is representative of four independent experiments performed in duplicate.

**Supplemental Tables:**

**Table S1. Alignment\* summary of smRNA-Seq data from RVSMC (control and treated with AngII at indicated time points).**

|                            | Control    | AngII-1h   | AngII-3h   | AngII-24h  |
|----------------------------|------------|------------|------------|------------|
| Total Reads                | 17,543,266 | 15,316,955 | 16,882,569 | 17,394,986 |
| Aligned Reads              | 10,025,034 | 9,124,473  | 10,242,621 | 10,129,837 |
| Unique Aligned Reads       | 7,437,728  | 6,854,922  | 7,834,212  | 7,827,523  |
| Multiple Aligned Reads     | 2,587,306  | 2,269,551  | 2,408,409  | 2,302,314  |
| Gapped Aligned Reads       | 17,613     | 14,077     | 13,904     | 26,046     |
| Quality Filtered Reads     | 3,146,579  | 2,196,319  | 2,510,771  | 2,859,013  |
| Homopolymer Filtered Reads | 1,148      | 1,219      | 1,631      | 1,081      |

\* Raw sequences for each sample were aligned against Rat Nov. 2004 (rn4) assembly using Novoalign software (<http://www.novocraft.com>).

**Table S2. Annotation summary of the aligned reads from RVSMC (control and treated with AngII at indicated time points).**

| Order               | Genomic feature   | Control    | AngII-1h  | AngII-4h   | AngII-12h  |
|---------------------|-------------------|------------|-----------|------------|------------|
| 1                   | mature miRNA      | 8,518,139  | 8,030,715 | 9,044,476  | 8,888,575  |
| 2                   | pre-miRNA region  | 25,809     | 26,399    | 26,724     | 24,340     |
| 3                   | rRNA              | 240,883    | 198,145   | 199,175    | 243,809    |
| 4                   | tRNA              | 104,889    | 79,967    | 72,941     | 161,265    |
| 5                   | other ncRNA       | 39,311     | 28,233    | 32,835     | 32,235     |
| 6                   | Refseq gene       | 472,189    | 314,870   | 392,874    | 349,385    |
| 7                   | intergenic region | 614,528    | 438,869   | 466,958    | 411,548    |
| Total Aligned Reads |                   | 10,015,748 | 9,117,198 | 10,235,983 | 10,111,156 |

**Table S3. Primers used in the RT-QPCR.**

| <b>Primer name</b> | <b>Forward Sequence (5' to 3')</b> | <b>Reverse Sequence (5' to 3')</b> |
|--------------------|------------------------------------|------------------------------------|
| RNU6A-F            | GATGACACGCAAATTCGTG                | Qiagen miScript universal primer   |
| miR-132-F          | TAACAGTCTACAGCCATGGTCG             | Qiagen miScript universal primer   |
| miR-7a-F           | TGGAAGACTAGTGATTTTGTGT             | Qiagen miScript universal primer   |
| rCYPA              | TATCTGCACTGCCAAGACTGAGTG           | CTTCTTGCTGGTCTTGCCATTCC            |
| mGAPDH             | CCTGCACCACCAACTGCTTAG              | CATGCGGTGGCAGTGATGGCATG            |
| rPTEN              | GAAGACCATAACCCACCACAGC             | CGGACCACAAATCATTACACCAG<br>TCCG    |
| mPTEN              | Same as the rat sequence.          |                                    |
| rMCP-1             | CGACTCCAAGATGATCCCAATGAGTCG        | TCTCTTGAGCTTGGTGACAAATA<br>CTACA   |
| mMCP-1             | AGGTCCCTGTGTCATGCTTCTGG            | CAGCACTTCTTTGGGACACCTGC<br>TG      |
| rRASA-1            | CGGCGATAGCTGGGCAGATAAGCCG          | CAGAAATACTCCACCGACACTG<br>AGATA    |
| rZEB2              | CGGAGACCACAGCATACCCACTCCG          | CAGGACCGCCTTGATCTCTTC              |
| rFOXO3             | CGGTACAACCAGTCCCTTAAACAGTACCG      | AAAGGTGGCTGGTCTGTTCTCC             |
| rARGF11            | CGGTCTGGTGTGAAAGAGGGTGACCG         | CGGAGGGAGGAGAAGAGCCTA              |
| rSOX4              | CGCAGACTGCTCCATGATCTTGCG           | GACGACCCTAGCTGGTGCAA               |
| rSSH2              | CGGTAGACAGTGTTGGCGTGTTACCG         | CATGCTCCTTACCACACCAG               |

\*miR-129, miR-212 and miR-21\* miRscript primers were purchased from commercial sources (miScript assays, Qiagen, Valencia, CA).
